# Supplementary material
Source: MDPI journal article supplement (https://www.mdpi.com/2071-1050/15/11/9138)
Supplement: s1 [file s1 › sustainability-2242554-supplementary.pdf]

## SUPPLEMENTARY MATERIALS

Table S1. Summary of main features of case studies and survey sample

|                                                         | Torre Guaceto                                                                                                                                                                                                                                                                                                       | Egadi Islands                                                                                                                                                                                                                                                                                     | Telašćica                                                                                                                                                                  | Gouraya                                                                                                                                                                                                     | Taza                                                                                                                                              | Tabarka                                                                                                                                                                                                                                                  |
|---------------------------------------------------------|---------------------------------------------------------------------------------------------------------------------------------------------------------------------------------------------------------------------------------------------------------------------------------------------------------------------|---------------------------------------------------------------------------------------------------------------------------------------------------------------------------------------------------------------------------------------------------------------------------------------------------|----------------------------------------------------------------------------------------------------------------------------------------------------------------------------|-------------------------------------------------------------------------------------------------------------------------------------------------------------------------------------------------------------|---------------------------------------------------------------------------------------------------------------------------------------------------|----------------------------------------------------------------------------------------------------------------------------------------------------------------------------------------------------------------------------------------------------------|
| Designation                                             | MPA                                                                                                                                                                                                                                                                                                                 | MPA                                                                                                                                                                                                                                                                                               | Nature Park                                                                                                                                                                | National Park – MPA projected II                                                                                                                                                                            | National Park – MPA projected II                                                                                                                  | MPA projected                                                                                                                                                                                                                                            |
| IUCN category                                           | IV                                                                                                                                                                                                                                                                                                                  | IV                                                                                                                                                                                                                                                                                                | V                                                                                                                                                                          | II                                                                                                                                                                                                          | II                                                                                                                                                | -                                                                                                                                                                                                                                                        |
| Country                                                 | Italy                                                                                                                                                                                                                                                                                                               | Italy                                                                                                                                                                                                                                                                                             | Croatia                                                                                                                                                                    | Algeria                                                                                                                                                                                                     | Algeria                                                                                                                                           | Tunisia                                                                                                                                                                                                                                                  |
| Date of establishment/Starting process of establishment | Inter-Ministerial Decree 4/12/1991                                                                                                                                                                                                                                                                                  | Inter-Ministerial Decree 27 <sup>th</sup> December 1991                                                                                                                                                                                                                                           | 27 <sup>th</sup> 1988 Official Gazette "Narodne novine" 14/88                                                                                                              | <b>NP:</b> Decree no 84-327 of 3 November 1984: “Création du Parc National de Gouraya (Wilaya de Bejaïa)”;<br><b>MPA:</b> Proposed in 2003, updated in 2013 with a reduction of the surface area of the MPA | <b>NP:</b> Decree no 84-328 of 3 November 1984 : “Création du Parc National de Taza et de Banc des Kabyles Marine– Reserve; MPA: proposed in 2009 | Projected in the Loi-cadre sur les Aires Marines et Côtiers Protégées (AMCP) de Banc des Kabyles Marine– Law no 49-2009 of 20 July 2009. Ministerial Decree on 28 April 2017 "Creation of the 'National Council for Marine and Coastal Protected Area'". |
| Stage of establishment                                  | Actively managed                                                                                                                                                                                                                                                                                                    | Actively managed                                                                                                                                                                                                                                                                                  | Actively managed                                                                                                                                                           | Proposed/Committed                                                                                                                                                                                          | Proposed/Committed                                                                                                                                | Proposed/Committed                                                                                                                                                                                                                                       |
| Description                                             | 2,200 ha on the south-east coast of Italy, in the Apulia region, in the province of Brindisi                                                                                                                                                                                                                        | 53,992 ha on the north-west coast of Sicily, in the province of Trapani. It includes the three islands of Favignana, Levanzo and Marettimo, plus the islets of Formica and Maraone.                                                                                                               | 6999.28 ha located on the eastern coast of the Adriatic Sea, covering the southern part of the island of Dugi Otok. The bay is surrounded by 13 islands, islets and rocks. | 7.842 ha on the west of the Gulf of Bejaïa in the municipality of Bejaïa                                                                                                                                    | 9.603 ha on the north-east coast of Algiers                                                                                                       | 327.855 ha on the north-west coast of Tunisia                                                                                                                                                                                                            |
| Legal national framework                                | Framework Law on Protected Areas n° 394/1991                                                                                                                                                                                                                                                                        | Framework Law on Protected Areas n° 394/1991                                                                                                                                                                                                                                                      | Nature Protection Act 2013 (OG 80/13)                                                                                                                                      | Law no 11-02 (Pas classification and management)<br>Law no 02-02 (protection of the coastal areas)                                                                                                          | Law no 11-02 (Pas classification and management)<br>Law no 02-02 (protection of the coastal areas)                                                | Law no 88-20 of 13 April 1988: “Code forestier”<br>Law no 94-122 of 28 November 1994 : “Code de l’aménagement du territoire e de l’urbanisme”<br>Law no 2009-49 of 20 July 2009: “Aires marines et côtières protégées”                                   |
| International recognition                               | Sites of Community Importance (92/43/CE)<br>Natura 2000<br>Special Protection Area<br>Bird Directive (79/409/CE)<br>Convention on Wetlands of International Importance –<br>Torre Guaceto Ramsar Site)<br>European Charter for Sustainable Tourism in Protected Areas<br>Special Area of Conservation and a Special | SIC ITA010004 “Isola di Favignana”<br>SIC ITA010002 “Isola di Marettimo”<br>SIC ITA010003 “Isola di Levanzo”<br>SIC ITA010024 “Fondali dell’Arcipelago delle Isole Egadi”<br>ZPS ITA010027 “Arcipelago delle Egadi- Area marina e terrestre<br>Important Birs Area - I.B.A IT 57 “Egadi Islands”. | Natura 2000<br>Tentative List of the UNESCO World Heritage (29/01/2007)<br>Important Bird Area – I.B.A. HR018 “Kornati National Park and Telašćica Nature Park             | UNESCO – Biosphere Reserve (2004)                                                                                                                                                                           | UNESCO -Biosphere Reserve                                                                                                                         | -                                                                                                                                                                                                                                                        |

|                                 |                                                                                                                                                                                                |                                                                                                                                                                                              |                                                                                                                                                                                                                                                                                                                                                               |                                                                                                                                                       |                                                                                                                                                       |                                                                                |
|---------------------------------|------------------------------------------------------------------------------------------------------------------------------------------------------------------------------------------------|----------------------------------------------------------------------------------------------------------------------------------------------------------------------------------------------|---------------------------------------------------------------------------------------------------------------------------------------------------------------------------------------------------------------------------------------------------------------------------------------------------------------------------------------------------------------|-------------------------------------------------------------------------------------------------------------------------------------------------------|-------------------------------------------------------------------------------------------------------------------------------------------------------|--------------------------------------------------------------------------------|
|                                 | Protected Area of the Mediterranean Importance<br>2019 Blue Parks Awardee                                                                                                                      |                                                                                                                                                                                              |                                                                                                                                                                                                                                                                                                                                                               |                                                                                                                                                       |                                                                                                                                                       |                                                                                |
| Zoning                          | <ul style="list-style-type: none"> <li>• Zone A: integral reserve</li> <li>• Zone B: general reserve</li> <li>• Zone C: partial reserve</li> </ul>                                             | <ul style="list-style-type: none"> <li>• Zone A: integral reserve</li> <li>• Zone B: general reserve</li> <li>• Zone C: partial reserve</li> <li>• Zone D: buffer protection zone</li> </ul> | <ul style="list-style-type: none"> <li>• Zone one of strict protection: 1a and 1b</li> <li>• Zone of active protection: 1. Sub-zone for the regulation of commercial activities; 2. Sub-zone for the conservation of marine biological resources; 3. No-take sub-zone</li> <li>• Zone of sustainable use</li> <li>• Zone D: buffer protection zone</li> </ul> | <ul style="list-style-type: none"> <li>• Area of ecological interest</li> <li>• Economic exploitation zone</li> <li>• Buffer zone</li> </ul>          | <ul style="list-style-type: none"> <li>• No-take zone</li> <li>• Peripheral zone</li> <li>• Buffer zone</li> </ul>                                    | -                                                                              |
| Government authority            | Management Consortium with representatives from Brindisi and Carovigno municipalities and WWF                                                                                                  | Municipality of Favignana                                                                                                                                                                    | Telascica Nature Park Public Institution located in Sali (Dugi Otok)                                                                                                                                                                                                                                                                                          | Directorate General of Forests (DGF)                                                                                                                  | Directorate General of Forests (DGF)                                                                                                                  | -                                                                              |
| Staff capacity Full-time        | 10                                                                                                                                                                                             | 15                                                                                                                                                                                           | 24                                                                                                                                                                                                                                                                                                                                                            | 74 (terrestrial park)                                                                                                                                 | -                                                                                                                                                     | -                                                                              |
| Seasonal                        | 5                                                                                                                                                                                              | 45                                                                                                                                                                                           | 15                                                                                                                                                                                                                                                                                                                                                            | -                                                                                                                                                     | -                                                                                                                                                     | -                                                                              |
| Budget capacity                 | € 1,146,265                                                                                                                                                                                    | € 1,147,035.79                                                                                                                                                                               | € 1,500,000                                                                                                                                                                                                                                                                                                                                                   | -                                                                                                                                                     | -                                                                                                                                                     | -                                                                              |
| Planning & Management tools     | Management plan (2002); ISEA; Management plan for artisanal fishing in co-management with SSF                                                                                                  | Management plan (2010); ISEA                                                                                                                                                                 | Management plan (2012-2022); Sustainable Tourism Plan; Fishery Management plan 2021                                                                                                                                                                                                                                                                           | -                                                                                                                                                     | -                                                                                                                                                     | -                                                                              |
| Fishery regulations             | Fishery regulation (2008)                                                                                                                                                                      | Supplementary procedural guidelines to the Egadi Islands MPA (Ministerial Decree n° 145 of 23 June 2010)                                                                                     | Fisheries Act, Rule Books                                                                                                                                                                                                                                                                                                                                     | National Law 1-11 3-07-2001, regarding fish, aquaculture, traditional fish trade near the coast. Local fisheries management plan approval is required | National Law 1-11 3-07-2001, regarding fish, aquaculture, traditional fish trade near the coast. Local fisheries management plan approval is required | Ministerial Decree 20/09/1994 and 28/09/1995- Tunisian Ministry of Agriculture |
| Patrol & regulation enforcement | MPA integrate the surveillance activity provided by national and local institution with own personnel five units (two rubber boats and 1 jeep + 1 boat to collect floating rubbish and debris) | 4 naval units in summer period to support the surveillance activities carried out by the competent authorities                                                                               | 5 guards all year round + 2 extra during the summer, 10 boats. To be improved with SSF involvement in enforcement activities                                                                                                                                                                                                                                  | -                                                                                                                                                     | -                                                                                                                                                     | -                                                                              |

Table S2. Description of the response variables underlie MPAs social acceptability

| Variable                                        | Description                                                                                                                               | Survey question                                                                                                            | Score                                                                                                                                                                                                              |
|-------------------------------------------------|-------------------------------------------------------------------------------------------------------------------------------------------|----------------------------------------------------------------------------------------------------------------------------|--------------------------------------------------------------------------------------------------------------------------------------------------------------------------------------------------------------------|
| Trust (proxy of MPA acceptability)              | Positive assumption about motivations and intentions of other part, that affects the level of stakeholder support for management activity | How would you classify the overall level of small-scale fishermen support for the MPA?                                     | 98=missing value<br>1= strong opposition to the MPA<br>2= some opposition to the MPA<br>3=neutral (neither support nor opposition) towards the MPA<br>4= some support for the MPA<br>5= strong support for the MPA |
|                                                 |                                                                                                                                           | On the whole, how do you evaluate the establishment of an MPA?                                                             | 98= missing value<br>1= Very negative<br>2= Rather negative<br>3= Neutral<br>4= Rather positive<br>5= Very positive                                                                                                |
| Environmental Quality                           | Perceptions about state of marine resources and changes in fish stock and volume catch                                                    | In general, would you say that the number of fish in the sea are increasing, decreasing or is <u>unchanging</u> over time? | 98=missing value<br>1= Decreasing<br>2=Unchanging<br>3= Increasing                                                                                                                                                 |
|                                                 |                                                                                                                                           | Since you started to fish, the volume of your catches is increased, decreased or unchanged?                                | 98= missing value<br>1= Decreased<br>2= Unchanged<br>3= Increased                                                                                                                                                  |
| Relationship “SSF & recreational fishers”       | Assessment of relationship quality levels between SSF and recreational fishers                                                            | Please, define how you consider the relationship between SSF and recreational fishers                                      | 98= missing value<br>1= Very bad<br>2= Bad<br>3= Neutral<br>4= Good<br>5= Very good                                                                                                                                |
| Relationship “SSF & other professional fishers” | Assessment of relationship quality levels between SSF and others professional fishers’ categories                                         | Please, define how you consider the relationship between SSF and other professional fishers                                | 98= missing value<br>1= Very bad<br>2= Bad<br>3= Neutral<br>4= Good<br>5= Very good                                                                                                                                |
| Relationship “SSF & tourists”                   | Assessment of relationship quality levels between SSF and tourists                                                                        | Please, define how you consider the relationship between SSF and tourists                                                  | 98= missing value<br>1= Very bad<br>2= Bad<br>3= Neutral<br>4= Good<br>5= Very good                                                                                                                                |
| Level of illegal fishing                        | Perceptions of the level of illegal fishing                                                                                               | In your opinion, which is the overall level of illegal fishing?                                                            | 98= Missing value<br>1= High<br>2= Medium<br>3= Low<br>4= No poaching                                                                                                                                              |
| Illegal fishing impacts                         | Perception of the level of impact of illegal fishing on artisanal fishing                                                                 | Do you think that illegal fishing is impacting small scale fishery?                                                        | 98= Missing value<br>1= High impact<br>2= Medium impact<br>3= Low impact<br>4= No impact                                                                                                                           |

|                           |                                                                                                                           |                                                                                                                                                        |                                                                                                                                                                                            |
|---------------------------|---------------------------------------------------------------------------------------------------------------------------|--------------------------------------------------------------------------------------------------------------------------------------------------------|--------------------------------------------------------------------------------------------------------------------------------------------------------------------------------------------|
| MPA social role           | Assessment of the level of satisfaction about the social role of MPA                                                      | Please rate your personal opinion about your level of satisfaction or dissatisfaction on the social impacts of the MPA                                 | 98=missing value<br>1=Very dissatisfied<br>2=Somewhat dissatisfied<br>3=Neutral<br>4=Somewhat satisfied<br>5=Very satisfied                                                                |
|                           | Assessment of the level of importance about the social role of MPA                                                        | Please rate your personal opinion about the social impacts of the MPA                                                                                  | 98= missing value<br>1= Not important<br>2= Slightly important<br>3= Fairly important<br>4= Important<br>5= Very important                                                                 |
| MPA governance role       | Assessment of the level of satisfaction about the planning & decision-making process performed or be performed by the MPA | Please rate your personal opinion about your level of satisfaction or dissatisfaction on the planning and decision-making process for the MPA          | 98=missing value<br>1=Very dissatisfied<br>2=Somewhat dissatisfied<br>3=Neutral<br>4=Somewhat satisfied<br>5=Very satisfied                                                                |
|                           | Assessment of the level of importance about the planning & decision-making process performed or be performed by the MPA   | Please rate your personal opinion about the governance and decision-making process of the MPA                                                          | 98= missing value<br>1= Not important<br>2= Slightly important<br>3= Fairly important<br>4= Important<br>5= Very important                                                                 |
| MPA management role       | Assessment of the level of satisfaction about the management role of MPA                                                  | Please rate your personal opinion about your level of satisfaction or dissatisfaction on the overall management activities of the MPA                  | 98=missing value<br>1=Very dissatisfied<br>2=Somewhat dissatisfied<br>3=Neutral<br>4=Somewhat satisfied<br>5=Very satisfied                                                                |
|                           | Assessment of the level of importance about the management role of MPA                                                    | Please rate your personal opinion about the managerial impacts on the MPA                                                                              | 98= missing value<br>1= Not important<br>2= Slightly important<br>3= Fairly important<br>4= Important<br>5= Very important                                                                 |
| MPA economic impacts      | Assessment of the economic impacts that the MPA has generated or could generated on artisanal fishing                     | What do you think has been/will be the impact of the MPA on your income?                                                                               | 98=missing value<br>1= the MPA has/will lead to a decline in your income<br>2=the MPA has not had/won't an effect on your income<br>3= the MPA has/will lead to an increase in your income |
| Biodiversity conservation | Assessment of the degree of agreement about the SSF support on biodiversity conservation activities                       | Please indicate to what extend you agree with this statement: The small-scale fishermen could work with MPA management to help to protect biodiversity | 98=missing value<br>1= Fully disagree<br>2= Somewhat disagree<br>3=Neutral<br>4= Somewhat agree<br>5= Fully agree                                                                          |
| Environmental education   | Assessment of the degree of agreement about the SSF support on environmental education activities                         | Please indicate to what extend you agree with this statement: The small-scale fishermen could be willing to practice fishing with                      | 98=missing value<br>1= Fully disagree<br>2= Somewhat disagree<br>3=Neutral                                                                                                                 |

|             |                                                                                                                          |                                                                                                                                                                                |                                                                                                                   |
|-------------|--------------------------------------------------------------------------------------------------------------------------|--------------------------------------------------------------------------------------------------------------------------------------------------------------------------------|-------------------------------------------------------------------------------------------------------------------|
|             |                                                                                                                          | educational aims or other educational activities to promote conservation goals                                                                                                 | 4= Somewhat agree<br>5= Fully agree                                                                               |
| Stewardship | Assessment of the degree of degree of agreement about the SSF commitment to monitor, identify and reduce illegal fishing | Please indicate to what extend you agree with this statement: The small-scale fishermen could cooperate with the MPA authority to monitor, identify and reduce illegal fishing | 98=missing value<br>1= Fully disagree<br>2= Somewhat disagree<br>3=Neutral<br>4= Somewhat agree<br>5= Fully agree |

*\*The term 'other professional fishers' encompasses those fishers mainly oriented towards a medium and large-scale fishery. Operating at larger scale than SSF, they have a semi-industrial or industrial nature and generally used large vessels (greater than 12 m in length) for fishing activities that are mainly carried out in offshore fishing zones.*

Table S3. Description of predictors of MPAs social acceptability

| SOCIO – DEMOGRAPHIC DIMENSION |                                                                                                                                 |                                                    |                                                                                                                                       |                                                                                                    |
|-------------------------------|---------------------------------------------------------------------------------------------------------------------------------|----------------------------------------------------|---------------------------------------------------------------------------------------------------------------------------------------|----------------------------------------------------------------------------------------------------|
| Variable                      | Description                                                                                                                     | Survey questions/Definition for measurement        | Potential responses                                                                                                                   | Categorization                                                                                     |
| Age (AGE)                     | Age of respondents                                                                                                              | What is your age group?                            | 98=missing value<br>1=20-30 years old<br>2=31-40 years old<br>3=41-50 years old<br>4=51-60 years old<br>5=61+ years old               | Young: under 40 years old<br>Old: over 41 years old                                                |
| Study degree (SD)             | Level of education of small-scale fishers                                                                                       | What is your highest level of education completed? | 98=missing variable<br>1=None<br>2=Elementary school<br>3=Middle school<br>4=High school<br>5=University degree – Bachelors or higher | Low educational level: at most elementary school<br>High educational level: at least middle school |
| GOVERNANCE DIMENSION          |                                                                                                                                 |                                                    |                                                                                                                                       |                                                                                                    |
| Variable                      | Description                                                                                                                     | Survey questions/Definition for measurement        | Potential responses                                                                                                                   | Categorization                                                                                     |
| Institutional Maturity (IM)   | Level of legislative support (MPA legally gazetted) recognized under statutory civil law, international convention or agreement | Legal MPA status                                   | 1= MPA has been legally gazetted<br>2= MPA is not gazetted                                                                            | MPA legally gazetted<br>MPA not legally gazetted                                                   |

Table S4. Contextual variables description at national level

| Country                                                                 | Algeria (%) | Croatia (%) | Italy (%) | Tunisia (%) |
|-------------------------------------------------------------------------|-------------|-------------|-----------|-------------|
| 1. Marine protected Areas (% of territorial waters)                     | 0.1         | 8.5         | 8.8       | 1.0         |
| 2. Terrestrial and Marine Protected Areas (% of total territorial area) | 7.1         | 23.6        | 13.4      | 5.2         |
| 3. Natural resources' contribution to GDP (% of GDP)*                   | 16.4        | 0.7         | 0.1       | 2.2         |

Sources: World Bank, 2019. World Development Indicators; World Database on Protected Areas (WDPA)

\* The contribution of Natural resources to the GDP was the sum of oil rents, natural gas rents, coal rents, mineral rents, and forest rents. The estimates of natural resources contribution to GDP are calculated as the difference between the price of a commodity and the average cost of producing it. These unit rents are then multiplied by the physical quantities countries extract or harvest to determine the contribution of each commodity as a share of gross domestic product (GDP).

Table S5. Criteria for determining the number of principle components

|        | eigenvalue | variance%  | cum.variance% | Scree plot |
|--------|------------|------------|---------------|------------|
| Dim.1  | 4.5755051  | 32.6821796 | 32.68218      |            |
| Dim.2  | 2.5975129  | 18.5536634 | 51.23584      |            |
| Dim.3  | 1.8552912  | 13.2520799 | 64.48792      |            |
| Dim.4  | 1.0174155  | 7.2672533  | 71.75518      |            |
| Dim.5  | 0.8496726  | 6.0690902  | 77.82427      |            |
| Dim.6  | 0.7055225  | 5.0394467  | 82.86371      |            |
| Dim.7  | 0.5410603  | 3.8647165  | 86.72843      |            |
| Dim.8  | 0.5041786  | 3.6012755  | 90.32971      |            |
| Dim.9  | 0.4229729  | 3.0212353  | 93.35094      |            |
| Dim.10 | 0.2714820  | 1.9391569  | 95.29010      |            |
| Dim.11 | 0.2054236  | 1.4673111  | 96.75741      |            |
| Dim.12 | 0.1803391  | 1.2881367  | 98.04555      |            |
| Dim.13 | 0.1615370  | 1.1538358  | 99.19938      |            |
| Dim.14 | 0.1120867  | 0.8006192  | 100.0000      |            |

Table S6. Frequency distribution of socio-demographic variables

| Variable            | Total sample (%)<br>(N=124) | Telašćica (%)<br>(N=7) | Torre Guaceto (%)<br>(N=5) | Egadi Islands (%)<br>(N=21) | Gouraya (%)<br>(N=37) | Tabarka (%)<br>(N=20) | Taza (%)<br>(N=34) |
|---------------------|-----------------------------|------------------------|----------------------------|-----------------------------|-----------------------|-----------------------|--------------------|
| <u>AGE</u>          |                             |                        |                            |                             |                       |                       |                    |
| 20-30 years old     | 6                           | 14                     | 0                          | 21                          | 0                     | 5                     | 9                  |
| 31-40 years old     | 19                          | 14                     | 0                          | 11                          | 22                    | 35                    | 18                 |
| 41-50 years old     | 34                          | 43                     | 0                          | 26                          | 43                    | 15                    | 44                 |
| 51-60 years old     | 33                          | 29                     | 100                        | 26                          | 35                    | 30                    | 26                 |
| 61+ years old       | 6                           | 0                      | 0                          | 16                          | 0                     | 15                    | 3                  |
| Missing value       | 2                           | -                      | -                          | -                           | -                     | -                     | -                  |
| <u>STUDY DEGREE</u> |                             |                        |                            |                             |                       |                       |                    |
| None                | 12                          | 0                      | 0                          | 0                           | 19                    | 20                    | 12.1               |
| Elementary school   | 23                          | 0                      | 40                         | 20                          | 6                     | 55                    | 27.3               |
| Middle school       | 22                          | 0                      | 60                         | 55                          | 17                    | 10                    | 15.2               |
| High school         | 34                          | 100                    | 0                          | 25                          | 44                    | 15                    | 33.3               |

|                                                                          |    |     |     |    |     |    |      |
|--------------------------------------------------------------------------|----|-----|-----|----|-----|----|------|
| University degree/Bachelors or higher                                    | 7  | 0   | 0   | 0  | 14  | 0  | 12.1 |
| Missing value                                                            | 2  | -   | -   | -  | -   | -  | -    |
| <u>TYPE OF GEARS</u>                                                     |    |     |     |    |     |    |      |
| Trammel net/Gillnet                                                      | 94 | 100 | 100 | 71 | 100 | 95 | 97   |
| Longlines (Bottom & Pelagic)                                             | 44 | 0   | 0   | 52 | 51  | 60 | 38   |
| Traps for multi species fisheries/Lobster fisheries/Cephalopod fisheries | 8  | 29  | 20  | 33 | 0   | 0  | 0    |
| Lines/A pique                                                            | 6  | 0   | 0   | 14 | 8   | 5  | 3    |
| <u>N. OF PEOPLE IN HOUSEHOLD</u>                                         |    |     |     |    |     |    |      |
| 1 person                                                                 | 9  | 0   | 0   | 5  | 14  | 10 | 9.1  |
| 2 persons                                                                | 9  | 29  | 0   | 16 | 11  | 0  | 6.1  |
| 3 persons                                                                | 8  | 14  | 0   | 16 | 5   | 10 | 6.1  |
| 4 persons                                                                | 35 | 43  | 100 | 47 | 35  | 25 | 27.3 |
| 5 persons                                                                | 25 | 14  | 0   | 11 | 27  | 35 | 33.3 |
| 6 persons                                                                | 8  | 0   | 0   | 0  | 8   | 5  | 18.2 |
| 7 persons                                                                | 2  | 0   | 0   | 5  | 0   | 10 | 0    |
| 8 persons                                                                | 1  | 0   | 0   | 0  | 0   | 5  | 0    |
| Missing value                                                            | 2  | -   | -   | -  | -   | -  | -    |

Table S7. Correlation matrix between variables

|                                        | Trust  | Environmental quality | SSF & Recreational fishers | SSF & Other professional fishers | SSF & Tourists | Illegal fishing level | Illegal fishing impact | MPA social role | MPA governance role | MPA management role | MPA economic impact | Biodiversity conservation | Environmental Education | Stewardship | % of MPAs | % of Terrestrial and Marine PAs | Natural resources' contribution to GDP |
|----------------------------------------|--------|-----------------------|----------------------------|----------------------------------|----------------|-----------------------|------------------------|-----------------|---------------------|---------------------|---------------------|---------------------------|-------------------------|-------------|-----------|---------------------------------|----------------------------------------|
| Trust                                  | 1.000  | 0.567                 | 0.027                      | 0.405                            | 0.311          | 0.089                 | 0.115                  | 0.476           | 0.490               | 0.515               | 0.538               | 0.348                     | 0.335                   | 0.129       | 0.193     | 0.163                           | -0.389                                 |
| Environmental quality                  | 0.567  | 1.000                 | -0.050                     | 0.574                            | 0.314          | -0.014                | -0.083                 | 0.598           | 0.636               | 0.657               | 0.332               | 0.113                     | 0.228                   | 0.130       | 0.050     | -0.182                          | -0.488                                 |
| SSF & Recreational fishers             | 0.027  | -0.050                | 1.000                      | 0.145                            | 0.009          | 0.083                 | 0.099                  | -0.106          | -0.082              | 0.006               | -0.007              | -0.190                    | -0.095                  | -0.156      | 0.152     | 0.278                           | -0.124                                 |
| SSF & Other professional fishers       | 0.405  | 0.574                 | 0.145                      | 1.000                            | 0.547          | 0.501                 | 0.487                  | 0.363           | 0.447               | 0.625               | 0.060               | -0.037                    | 0.211                   | -0.046      | 0.619     | 0.345                           | -0.911                                 |
| SSF & Tourists                         | 0.311  | 0.314                 | 0.009                      | 0.547                            | 1.000          | 0.509                 | 0.450                  | 0.170           | 0.209               | 0.418               | 0.068               | 0.091                     | 0.171                   | 0.000       | 0.575     | 0.382                           | -0.649                                 |
| Illegal fishing level                  | 0.089  | -0.014                | 0.083                      | 0.501                            | 0.509          | 1.000                 | 0.851                  | -0.137          | -0.070              | 0.159               | -0.164              | -0.046                    | 0.059                   | -0.067      | 0.853     | 0.661                           | -0.667                                 |
| Illegal fishing impact                 | 0.115  | -0.083                | 0.099                      | 0.487                            | 0.450          | 0.851                 | 1.000                  | -0.132          | -0.091              | 0.183               | -0.111              | -0.003                    | 0.113                   | -0.138      | 0.920     | 0.835                           | -0.685                                 |
| MPA social role                        | 0.476  | 0.598                 | -0.106                     | 0.363                            | 0.170          | -0.137                | -0.132                 | 1.000           | 0.812               | 0.743               | 0.425               | -0.020                    | 0.219                   | -0.064      | -0.095    | -0.154                          | -0.313                                 |
| MPA governance role                    | 0.490  | 0.636                 | -0.082                     | 0.447                            | 0.209          | -0.070                | -0.091                 | 0.812           | 1.000               | 0.781               | 0.409               | 0.012                     | 0.207                   | -0.017      | 0.010     | -0.124                          | -0.407                                 |
| MPA management role                    | 0.515  | 0.657                 | 0.006                      | 0.625                            | 0.418          | 0.159                 | 0.183                  | 0.743           | 0.781               | 1.000               | 0.373               | -0.001                    | 0.363                   | -0.078      | 0.268     | 0.142                           | -0.627                                 |
| MPA economic impact                    | 0.538  | 0.332                 | -0.007                     | 0.060                            | 0.068          | -0.164                | -0.111                 | 0.425           | 0.409               | 0.373               | 1.000               | 0.110                     | 0.251                   | 0.043       | -0.102    | -0.043                          | -0.056                                 |
| Biodiversity conservation              | 0.348  | 0.113                 | -0.190                     | -0.037                           | 0.091          | -0.046                | -0.003                 | -0.020          | 0.012               | -0.001              | 0.110               | 1.000                     | 0.434                   | 0.464       | 0.014     | 0.004                           | 0.006                                  |
| Environmental education                | 0.335  | 0.228                 | -0.095                     | 0.211                            | 0.171          | 0.059                 | 0.113                  | 0.219           | 0.207               | 0.363               | 0.251               | 0.434                     | 1.000                   | 0.270       | 0.094     | 0.068                           | -0.230                                 |
| Stewardship                            | 0.129  | 0.130                 | -0.156                     | -0.046                           | 0.000          | -0.067                | -0.138                 | -0.064          | -0.017              | -0.078              | 0.043               | 0.464                     | 0.270                   | 1.000       | -0.097    | -0.238                          | 0.072                                  |
| % of MPAs                              | 0.193  | 0.050                 | 0.152                      | 0.619                            | 0.575          | 0.853                 | 0.920                  | -0.095          | 0.010               | 0.268               | -0.102              | 0.014                     | 0.094                   | -0.097      | 1.000     | 0.843                           | -0.807                                 |
| % of Terrestrial and Marine PAs        | 0.163  | -0.182                | 0.278                      | 0.345                            | 0.382          | 0.661                 | 0.835                  | -0.154          | -0.124              | 0.142               | -0.043              | 0.004                     | 0.068                   | -0.238      | 0.843     | 1.000                           | -0.547                                 |
| Natural resources' contribution to GDP | -0.389 | -0.488                | -0.124                     | -0.911                           | -0.649         | -0.667                | -0.685                 | -0.313          | -0.407              | -0.627              | -0.056              | 0.006                     | -0.230                  | 0.072       | -0.807    | -0.547                          | 1.000                                  |

Table S8. Correlation matrix between variables and principal components

|                                  | Dim.1  | Dim.2  | Dim.3  | Dim.4  | Dim.5  |
|----------------------------------|--------|--------|--------|--------|--------|
| Environmental quality            | 0.792  | -0.184 | -0.063 | -0.087 | 0.328  |
| SSF & Recreational fishers       | -0.029 | 0.240  | -0.282 | 0.814  | 0.384  |
| SSF & Other professional fishers | 0.716  | 0.483  | -0.087 | -0.047 | 0.271  |
| SSF & Tourists                   | 0.524  | 0.528  | 0.131  | -0.108 | 0.043  |
| Illegal fishing level            | 0.215  | 0.885  | 0.139  | -0.054 | -0.104 |
| Illegal fishing impact           | 0.212  | 0.870  | 0.147  | 0.027  | -0.235 |
| MPA social role                  | 0.767  | -0.341 | -0.298 | -0.146 | -0.054 |
| MPA governance role              | 0.806  | -0.281 | -0.267 | -0.148 | 0.033  |
| MPA management role              | 0.891  | 0.010  | -0.196 | -0.078 | -0.009 |
| MPA economic impact              | 0.505  | -0.382 | 0.009  | 0.406  | -0.468 |
| Trust                            | 0.742  | -0.116 | 0.212  | 0.310  | -0.113 |
| Biodiversity conservation        | 0.177  | -0.191 | 0.816  | 0.068  | 0.008  |
| Environmental education          | 0.444  | -0.084 | 0.547  | 0.105  | -0.174 |
| Stewardship                      | 0.061  | -0.237 | 0.705  | -0.062 | 0.432  |

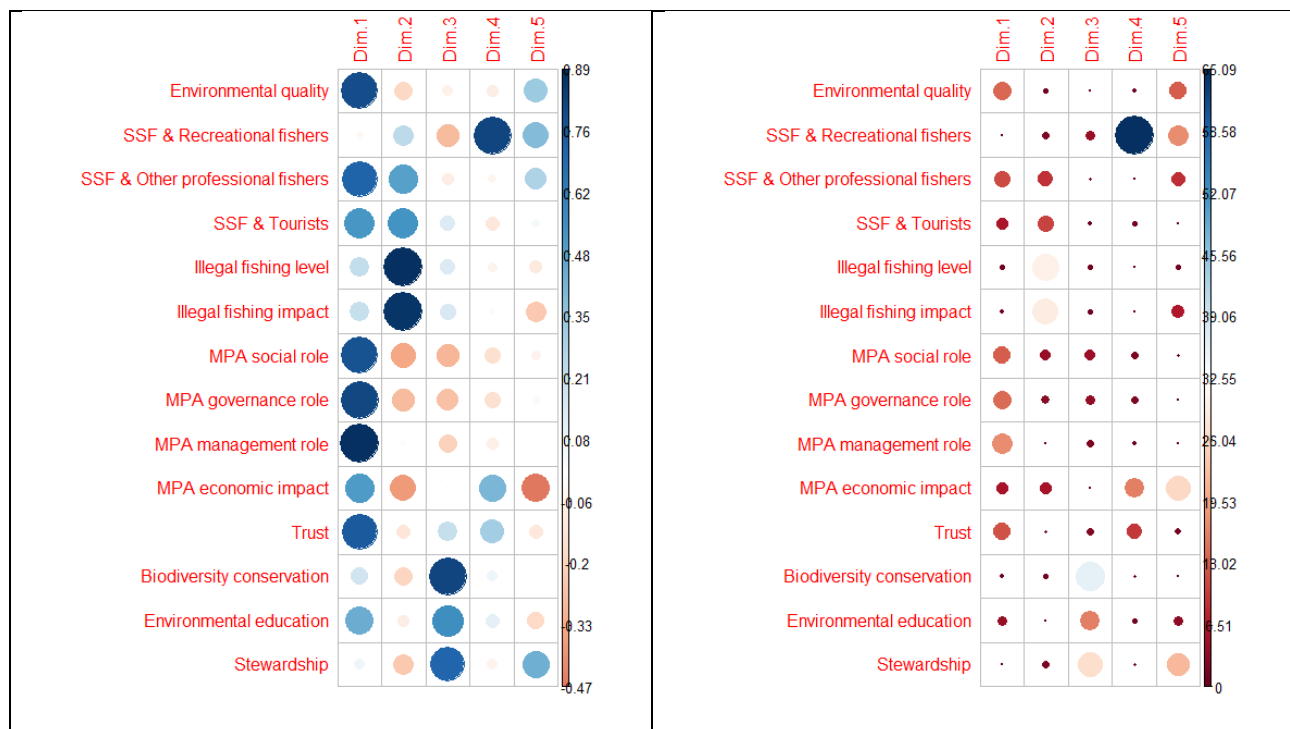

Figure S1. Graphic representation of the correlation matrix between variables and principal components

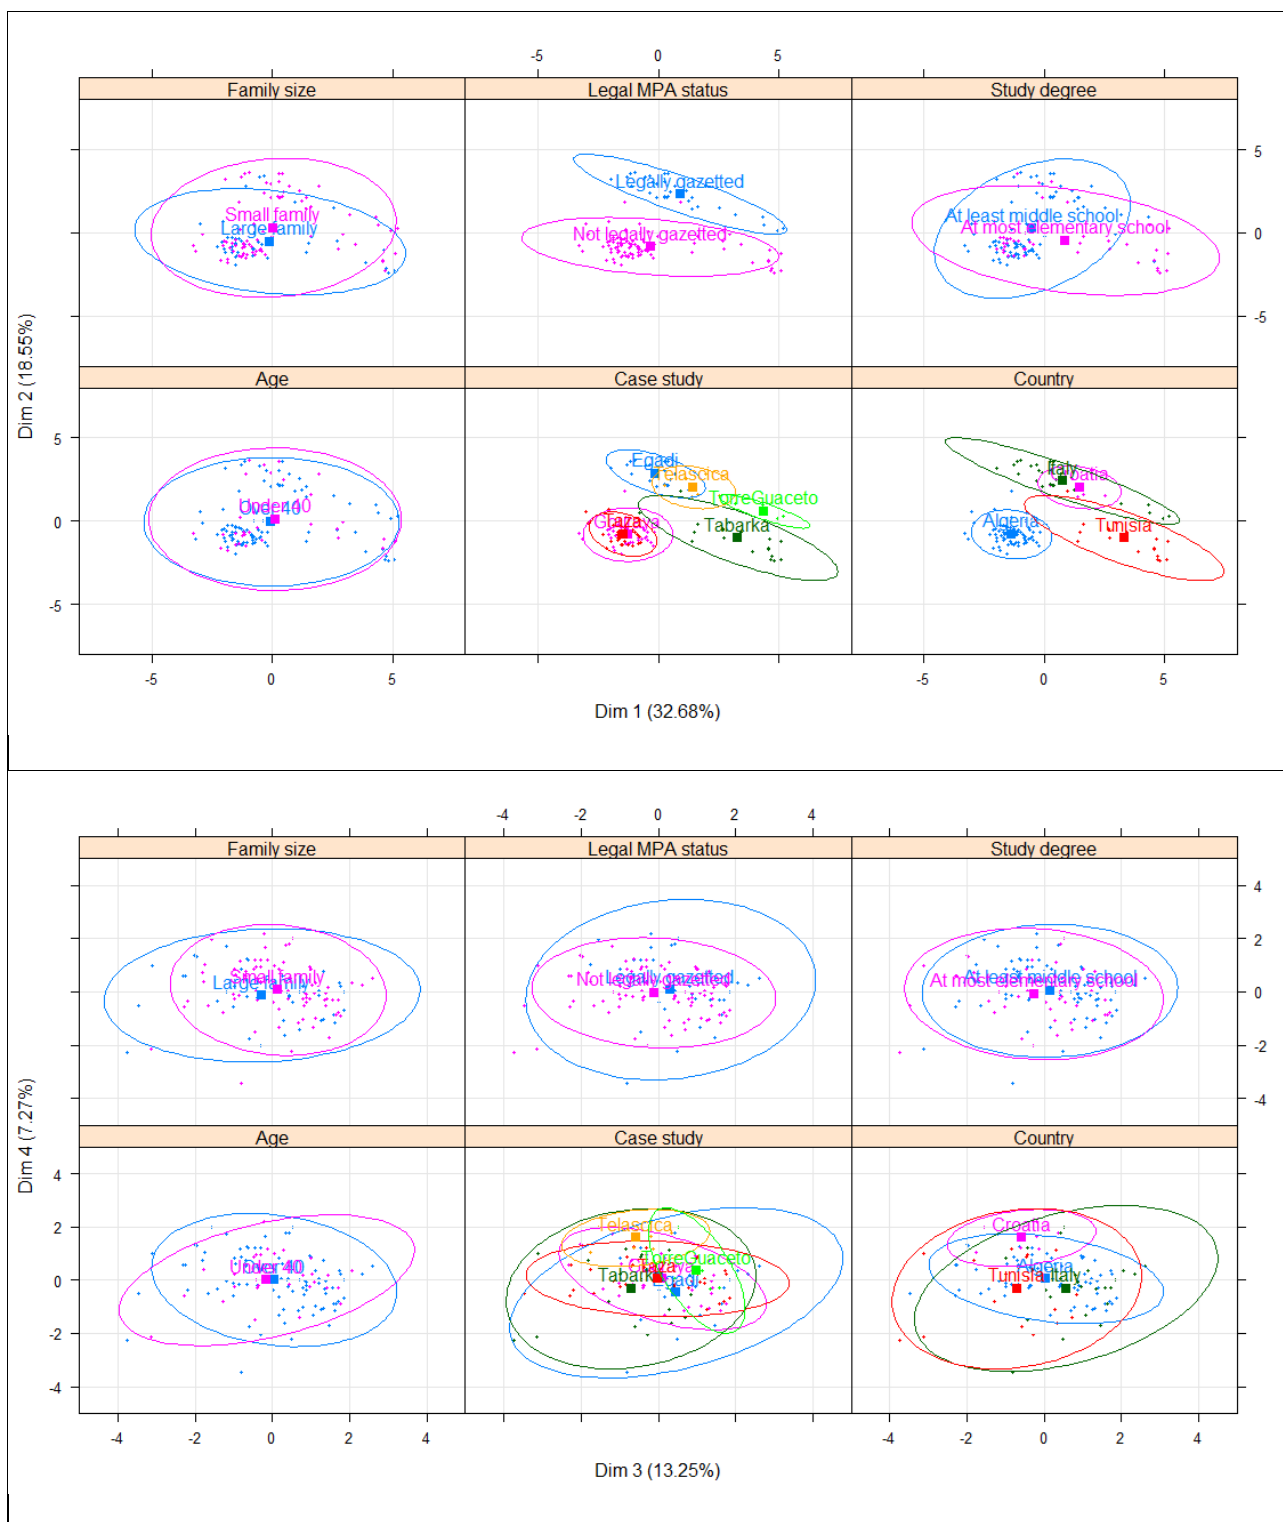

Figure S2. SSF' representation of the plane defined by the first and second PCs and the third and fourth PCs, classified according to the various supplementary qualitative variables identified in the model.
